# Supplementary material for: Completing a molecular timetree of apes and monkeys
Source: Frontiers journal article supplement (doi:10.3389/fbinf.2023.1284744), 2023-12-15
Supplement: Data_Sheet_1.zip [file Data_Sheet_1.zip]

## Sheet: Cytochrome B
Genus	Species	Accessions
Mico	chrysoleucus	ALS54778.1
Semnopithecus	ajax	UUA80951.1
Presbytis	senex	AAC27369.1
Cebus	versicolor	ARO72230.1
Nomascus	nasutus	ADR81969.1
Cercopithecus	dryas	AFA45453.1
Allochrocebus	solatus	AFA45465.1
Cercopithecus	doggetti	AFA45935.1
Cercopithecus	kandti	AFA46115.1
Leontocebus	cruzlimai	AJP15918.1
Chlorocebus	cynosuros	YP_009059471.1
Sapajus	flavius	YP_009937319.1
Alouatta	juara	YP_010410063.1
tie-ins to tt5, blasted from M chrysoleucus
Genus	Species	Accessions
Mico	argentatus	YP_010409790.1
Mico	emiliae	WGH51103.1
tie-ins to tt5, blasted from S ajax UUA80962.1
Genus	Species	Accessions
Semnopithecus	hector	AAS94016.1
Semnopithecus	entellus	ABV44673.1
tie-ins to tt5, blasted from P senex
Genus	Species	Accessions
Trachypithecus	vetulus	YP_007024942.1
Root
Genus	Species	Accessions
Lemur	Catta	YP_010229101.1

## Sheet: Pithecia aequatorialis
Genus	Species	Accessions
Pithecia	aequatorialis	QVX27322.1
tie-ins to tt5, blasted from QVX27325.1
Genus	Species	Accessions
Pithecia	pithecia	AAC84068.1
Cacajao	calvus	AKQ76661.1
Callithrix	jacchus	AAN62589.1
Root
Genus	Species	Accessions
Homo	sapiens	AAB59524.1

## Sheet: Presbytis senex
Genus	Species	Accessions
Presbytis	senex	AAC27369.1
tie-ins to tt5, blasted from AAC27369.1
Genus	Species	Accessions
Trachypithecus	johni	AAC27368.1
Trachypithecus	pileatus	AAM68932.1
Trachypithecus	vetulus	AAM68930.1
Root
Genus	Species	Accessions
Pygathrix	nigripes	YP_006460529.1

## Sheet: Trachypithecus vetulus
Genus	Species	Accessions
Trachypithecus	vetulus	YP_007024942.1
tie-ins to tt5, blasted from YP_007024942.1
Genus	Species	Accessions
Trachypithecus	cristatus	YP_009025008.1
Trachypithecus	geei	AAM68924.1
Trachypithecus	pileatus	AAM68932.1
Root
Genus	Species	Accessions
Papio	cynocephalus	ANQ43719.1

## Sheet: Cercopithecus sclateri
Genus	Species	Accessions
Cercopithecus	sclateri	BAT21105.1
tie-ins to tt5, blasted from BAT21106.1
Genus	Species	Accessions
Cercopithecus	erythrotis	BAT21102.1
Cercopithecus	cephus	ACX46508.1
Cercopithecus	denti	CCG14706.1
Root
Genus	Species	Accessions
Homo	sapiens	NP_004326.1

## Sheet: Macaca balantak
Genus	Species	Accessions
Macaca	balantak	AY633530.1
tie-ins to tt5, blasted from AY633531.1
Genus	Species	Accessions
Macaca	fascicularis	MF893947.1
Macaca	tonkeana	MT300244.1
Macaca	nemestrina	NC_026976.1
Root
Genus	Species	Accessions
Macaca	nigra	AY633536.1

## Sheet: Macaca speciosa
Genus	Species	Accessions
Macaca	speciosa	CAC69968.1
tie-ins to tt5, blasted from CAC69968.1
Genus	Species	Accessions
Macaca	fascicularis	XP_045226262.1
Macaca	fascicularis	XP_024644529.1
Macaca	mulatta	XP_001113672.1
Trachypithecus	francoisi	XP_033061564.1
Root
Genus	Species	Accessions
Homo	sapiens	CAC69964.1
Pongo	abelii	XP_002822227.2

## Sheet: Callithrix flaviceps
Genus	Species	Accessions
Callithrix	flaviceps	KC762189.1
tie-ins to tt5
Genus	Species	Accessions
Callithrix	penicillata	KC762188.1
Callithrix	geoffroyi	KC762191.1
Mico	argentatus	KC762192.1
Leontocebus	fusicollis	KC762185.1
Saguinus	midas	GQ279999.1
Root
Genus	Species	Accessions
Aotus	lemurinus	JQ932982.1

## Sheet: Aotus zonalis
Genus	Species	Accessions
Aotus	zonalis	AFY23748.1
tie-ins to tt5, blasted from AFY23748.1
Genus	Species	Accessions
Cebus	albifons	AEP17726.1
Aotus	nancymaae	XP_012328057.1
Callithrix	jacchus	XP_002756184.1
Root
Genus	Species	Accessions
Homo	sapiens	KAI2555706.1

## Sheet: Cebus versicolor
Genus	Species	Accessions
Cebus	versicolor	ARO72230.1
tie-ins to tt5
Genus	Species	Accessions
Cebus	unicolor	YP_010409712.1
Cebus	albifrons	ARO72217.1
Sapajus	apella	AEQ59326.1
Root
Genus	Species	Accessions
Aotus	trivirgatus	ADM64762.1
